# Resting State Functional Connectivity is Decreased Globally Across the *C9orf72* Mutation Spectrum

Rachel F Smallwood Shoukry PhD<sup>1\*</sup>, Michael G Clark BS<sup>1</sup>, Mary Kay Floeter<sup>1</sup> MD PhD

<sup>1</sup>Motor Neuron Disease Unit, National Institute of Neurological Disorders and Stroke, National Institutes of Health, Bethesda, MD, USA

## \*Correspondence:

Mary Kay Floeter [floeterm@ninds.nih.gov](mailto:floeterm@ninds.nih.gov)

Please cc Rachel F Smallwood Shoukry  
[rachsmallwood@gmail.com](mailto:rachsmallwood@gmail.com)

10 Center Drive MSC 1140  
Bethesda MD 20892-1140

Co-author contact information

Michael G. Clark [michael.g.clark@vanderbilt.edu](mailto:michael.g.clark@vanderbilt.edu)

**Keywords: C9orf72; amyotrophic lateral sclerosis; behavioral variant frontotemporal dementia; presymptomatic; resting state fMRI; graph theory**

## Abstract

A repeat expansion mutation in the *C9orf72* gene causes amyotrophic lateral sclerosis (ALS), frontotemporal dementia (FTD), or symptoms of both, and has been associated with gray and white matter changes in brain MRI scans. We used graph theory to examine the network properties of brain function at rest in a population of mixed-phenotype *C9orf72* mutation carriers (C9+). Twenty-five C9+ subjects (presymptomatic, or diagnosed with ALS, behavioral variant FTD (bvFTD), or both ALS and FTD) and twenty-six healthy controls underwent resting state fMRI. When comparing all C9+ subjects with healthy controls, both global and connection-specific decreases in resting state connectivity were observed, with no substantial reorganization of network hubs. However, when analyzing subgroups of the symptomatic C9+ patients, those with bvFTD (with and without comorbid ALS) show remarkable reorganization of hubs compared to patients with ALS alone (without bvFTD), indicating that subcortical regions become more connected in the network relative to other regions. Additionally, network connectivity measures of the right hippocampus and bilateral thalami increased with increasing scores on the Frontal Behavioral Inventory, indicative of worsening behavioral impairment. These results indicate that while *C9orf72* mutation carriers across the ALS-FTD spectrum have global decreased resting state brain connectivity, phenotype-specific effects can also be observed at more local network levels.

## 47 1. Introduction

48  
49 A repeat expansion mutation in the *C9orf72* gene is the most frequent cause of familial  
50 amyotrophic lateral sclerosis (ALS) and familial frontotemporal dementia (FTD) in populations  
51 of Northern European origin (1, 2) accounting for 5-10% of sporadic cases of these disorders (3).  
52 Carriers of the *C9orf72* mutation (hereafter referred to as C9+) can present with clinical  
53 symptoms of ALS, FTD, or with combinations of motor, cognitive, and behavioral symptoms (4-  
54 7). Compared to patients with sporadic ALS or FTD, neuroimaging studies in C9+ ALS and FTD  
55 patients show more pronounced atrophy, particularly of subcortical structures and extramotor  
56 cortical regions (4, 8-15). Although subtle structural changes can be detected in groups of  
57 presymptomatic C9+ carriers (9, 16-18), most structural changes are found later in the disease  
58 course, when symptoms are manifest. In individual C9+ carriers, the structural changes may  
59 represent a hybrid pattern between those described for sporadic ALS and sporadic FTD,  
60 appearing to reflect the relative balance of motor and cognitive-behavioral dysfunction (10, 19-  
61 21).

62  
63 Functional connectivity changes also occur in patients with ALS and FTD. In sporadic and C9+  
64 FTD, intrinsic functional connectivity is reduced in the salience networks, frontal and temporal  
65 regions, and thalamic networks (13, 22-24). Findings from resting state fMRI studies in sporadic  
66 ALS are less consistent. Most reports find increased connectivity, particularly in the  
67 sensorimotor network and default mode network (25-28). However, others report decreased  
68 connectivity (29-32), or mixtures of increased and decreased network connectivity (33-36). We  
69 hypothesized that functional imaging in C9+ carriers would show a hybrid pattern on a  
70 continuum of those seen in ALS and FTD reflecting the relative balance of motor and cognitive-  
71 behavioral dysfunction in each patient. To examine this hypothesis, we evaluated changes in  
72 network measures and their association with clinical measures of motor and cognitive-behavioral  
73 dysfunction using graph theory metrics. In this analysis, each brain region is represented as a  
74 node and the relationship between two brain regions is represented as an edge connecting the two  
75 nodes (37). Graph theory allows us to quantify whole-brain network properties, as well as how  
76 regions interact with each other as part of a larger network.

77  
78 We first compared differences in network measures of functional connectivity in a heterogeneous  
79 group of C9+ carriers to healthy controls to identify changes associated with the *C9orf72*  
80 mutation itself. We then compared C9+ carriers with ALS alone (C9+ FTD-) to C9+ patients  
81 with behavioral variant FTD (bvFTD) or ALS-FTD within the cohort. We hypothesized that C9+  
82 with bvFTD/ALS-FTD would exhibit changes in networks associated with cognitive-behavioral  
83 function whereas C9+ FTD – ALS patients would exhibit changes in motor networks, and that  
84 network measures would correlate with clinical measures of motor or cognitive-behavioral  
85 function.

## 86 87 2. Methods

### 88 2.1 Participants

89  
90 Twenty-five carriers of the *C9orf72* expansion mutation (**Table 1**) were recruited from across the  
91 United States through online advertising, organizational outreach, and physician referrals between  
92 2013 and 2016. All subjects gave written informed consent in accordance with an IRB-approved

93 protocol. Inclusion criteria required the C9+ subjects to have >30 repeats in the *C9orf72* gene as  
94 established by repeat prime polymerase chain reaction in a CLIA certified lab. They were not  
95 excluded for having other comorbid conditions. All C9+ subjects were examined by an  
96 experienced neurologist and underwent electromyography and cognitive testing to determine  
97 their clinical diagnosis as previously reported (10). ALS was diagnosed using the 2015 revised  
98 El Escorial criteria (38). The International Consensus Criteria for behavioral variant FTD (39)  
99 were used for diagnosis of possible, probable, or definite bvFTD. The cohort consisted of C9+  
100 subjects classified as being presymptomatic (N=7), or as having ALS only (N=9), bvFTD only  
101 (N=3), or both ALS and bvFTD (N=6). C9+ patients were administered the revised ALS  
102 functional rating scale (ALSFRS-R; (40)) to quantify motor impairment related to ALS and the  
103 frontal behavioral inventory (FBI; (41)) to assess behavioral impairment related to bvFTD.  
104 Twenty-six healthy controls (HC) underwent the same imaging protocol as the C9+ patients as  
105 part of a separate IRB-approved study. All healthy controls had normal neurological  
106 examinations and a normal cognitive screening test.

107  
108

**Table 1** – Demographic information of study groups and sub-groups.

|                | <b>N (males)</b> | <b>Age (years)</b>   | <b>ALSFRS-R</b>   | <b>FBI</b>         |
|----------------|------------------|----------------------|-------------------|--------------------|
| <b>All C9+</b> | <b>25 (14)</b>   | <b>51.74 ± 11.95</b> | <b>42.8 ± 6.7</b> | <b>0.16 ± 0.17</b> |
| ALS            | 9 (4)            | 51.85 ± 9.95         | 41.6 ± 3.8        | 0.08 ± 0.08        |
| ALS-FTD        | 6 (6)            | 60.72 ± 10.19        | 41.8 ± 5.3        | 0.31 ± 0.08        |
| bvFTD          | 3 (3)            | 60.59 ± 5.11         | 46.0 ± 2.7        | 0.36 ± 0.2         |
| <b>HC</b>      | <b>26 (16)</b>   | <b>52.33±8.79</b>    | -                 | -                  |

109

110

## 111 **2.2 Imaging protocol**

112

113 Participants underwent MRI scanning on a GE 3T scanner. Two T1 FSPGR anatomical scans  
114 were collected (TI = 450 ms,  $\alpha = 13^\circ$ , voxel size = 1x0.938x0.938 mm). Resting state functional  
115 scans were collected during which subjects were instructed to stay awake, keep their eyes open,  
116 and think random thoughts (TR=2000ms, TE=30ms, flip angle=77, voxel size = 3.75x3.75x3.8  
117 mm, FOV = 64x64 cm, 40 slices, 214 volumes).

118

## 119 **2.3 Image processing**

120

121 Anatomical MRI data were processed in FreeSurfer and each subject's gray matter was  
122 parcellated into 82 volumes of interest (VOIs). These VOIs consisted of 34 cortical regions per  
123 hemisphere based on the Desikan-Killiany atlas (42) plus 14 subcortical VOIs, excluding the  
124 cerebellum (**Table 2**). Resting state functional data were preprocessed using FSL and custom  
125 MATLAB scripts. Preprocessing steps included motion and slice time correction, volume  
126 scrubbing based on motion outliers (identified by FSL's calculation of framewise displacement  
127 and the derivative of the time-course of root mean square intensity across voxels (DVARS; (43)),  
128 regression of motion parameters and white matter and CSF signals, and bandpass filtering

129 between 0.01-0.1 Hz. Each subject’s functional image was registered to their structural image.  
 130 The anatomical parcellation and segmentation were applied to the functional time series to  
 131 extract the 82 VOIs, and all the voxels within each VOI were averaged at every time point to  
 132 create a time series of average signal for each VOI.

133  
 134 **Table 2** – Volumes of interest used in the analysis and their abbreviations and color scheme as  
 135 displayed in Figure 3. Each region had a right and left representation. Blue – frontal lobe; green  
 136 – limbic system; yellow – basal ganglia; orange – temporal lobe; red – parietal lobe; purple –  
 137 occipital lobe.  
 138

| Region name                       | Abbreviation | Region name                           | Abbreviation |
|-----------------------------------|--------------|---------------------------------------|--------------|
| Frontal pole                      | Front-pole   | Caudate                               |              |
| Superior frontal gyrus            | SFG          | Putamen                               |              |
| Lateral orbitofrontal cortex      | Lat-OFC      | Accumbens area                        | Accumbens    |
| Medial orbitofrontal cortex       | Med-OFC      | Pallidum                              |              |
| Rostral middle frontal gyrus      | Rost-MFG     | Temporal pole                         | Temp-pole    |
| Pars triangularis                 | Pars-tri     | Superior temporal gyrus               | STG          |
| Pars orbitalis                    | Pars-orb     | Transverse temporal gyrus             | Transverse   |
| Pars opercularis                  | Pars-operc   | Banks of the superior temporal sulcus | Banks-STG    |
| Caudal middle frontal gyrus       | Caud-MFG     | Middle temporal gyrus                 | MTG          |
| Precentral gyrus                  | Precentral   | Inferior temporal gyrus               | ITG          |
| Paracentral lobule                | Paracentral  | Fusiform gyrus                        | Fusiform     |
| Rostral anterior cingulate cortex | Rost-ACC     | Insula                                |              |
| Caudal anterior cingulate cortex  | Caud-ACC     | Postcentral gyrus                     | Postcentral  |
| Posterior cingulate cortex        | PCC          | Supramarginal gyrus                   | Supramarg    |
| Isthmus of the cingulate cortex   | Isth-CC      | Superior parietal cortex              | SPC          |
| Amygdala                          |              | Inferior parietal cortex              | IPC          |
| Thalamus                          |              | Precuneus                             |              |
| Hippocampus                       |              | Cuneus                                |              |
| Entorhinal cortex                 | Entorhinal   | Lateral occipital cortex              | Lat-OC       |
| Parahippocampal gyrus             | Parahipp     | Pericalcarine cortex                  | Pericalc     |
|                                   |              | Lingual gyrus                         | Lingual      |

139  
 140  
 141  
 142  
 143  
 144  
 145  
 146  
 147

## 2.4 Graph theory analysis and statistics

A connectivity matrix was formed with each row and column representing a node (VOI) and each cell representing an edge with strength equal to the Pearson correlation coefficient (R) of the row/column pair. Fisher transformation was applied to permit multiple linear regression of age and gender effects, followed by back transformation to R. The matrices were then

148 thresholded by setting all connections below a specific R to zero. Thresholds from 0 to 0.7 were  
149 tested in increments of 0.1; thresholds >0.7 resulted in matrices too sparse for the calculation of  
150 may graph metrics. Thresholds between 0 to 0.4 yielded similar statistical results in global  
151 metrics, so  $R \geq 0.2$  was selected as the representative threshold for reporting. Graph theory  
152 metrics were calculated using custom MATLAB scripts and the Brain Connectivity Toolbox  
153 (<https://sites.google.com/site/bctnet> (37)).

154  
155 Two group analyses were performed: 1) all C9+ versus HC and 2) a sub-analysis of C9+ subjects  
156 in which symptomatic bvFTD+ patients (bvFTD & ALS-FTD, n=9) were compared to  
157 symptomatic ALS-only patients (ALS only, n=9). Group differences for both analyses were  
158 evaluated using global, nodal, and edge metrics (**Table 3**). Global metrics included network  
159 density, mean connection strength, mean node clustering coefficient, mean node path length, and  
160 modularity score. Nodal measures included node strength, closeness centrality, betweenness  
161 centrality, within-module degree Z score, and participation coefficient. Hubs, or nodes that are  
162 particularly highly connected and involved within the network, were identified with a composite  
163 hub score that was calculated by summing the Z scores of the five nodal measures.

164

165 **Table 3** – Description of graph analysis metrics.

| <b><u>Global Metric</u></b>  | <b><u>Description</u></b>                                                                                  |
|------------------------------|------------------------------------------------------------------------------------------------------------|
| Network density              | Fraction of all possible connections above the connection threshold                                        |
| Mean connection strength     | Average connection strength of connections above the connection threshold                                  |
| Clustering Coefficient       | Extent of node clustering; a measure of how often the neighbors of a node are also neighbors of each other |
| Path Length                  | Lowest number of connections required to travel between each node pair in the network                      |
| Modularity score             | Ability of the network to be segregated into discrete modules                                              |
| <b><u>Nodal Metric</u></b>   | <b><u>Description</u></b>                                                                                  |
| Node strength                | Sum of the strength of connections to all other nodes in the network                                       |
| Closeness centrality         | Nearness to all other nodes in the network                                                                 |
| Betweenness centrality       | Frequency at which the node lies on the shortest path between two other nodes                              |
| Within-module degree Z-score | Connectedness of a node within its own module                                                              |
| Participation coefficient    | Connectedness of a node to nodes in other modules                                                          |

166

167

168 Permutation testing was used to calculate effective p values (44). In each permutation, subjects'  
169 group assignments were randomly shuffled and the difference in the metric of interest between  
170 the two shuffled groups was calculated. The effective p value was defined as the fraction of total  
171 permutations in which the shuffled groups had a larger magnitude of difference in the graph  
172 metric than the actual study groups.  $1 \times 10^3$  permutations were used to ensure a sufficient number  
173 of significant figures for reporting.

174  
175  
176  
177  
178  
179  
180  
181  
182  
183  
184  
185  
186  
187

### 3. Results

#### 3.1 Comparison of C9+ carriers with Healthy Controls

##### 3.1.1 Global graph metrics – C9+ vs. HC

Analysis of global measures revealed that the C9+ carrier group had significantly lower global network density than HC, with fewer connections with strength greater than the correlation threshold (**Figures 1 & 2**). Those edges that survived thresholding had a significantly lower mean connection strength for C9+ than HC (**Figure 2**). The clustering coefficients were also significantly different between groups ( $p=0.018$ ). However, because path length and modularity score are sensitive to network density (45), any significant differences are likely to be influenced by the different network densities, so they were not further explored.

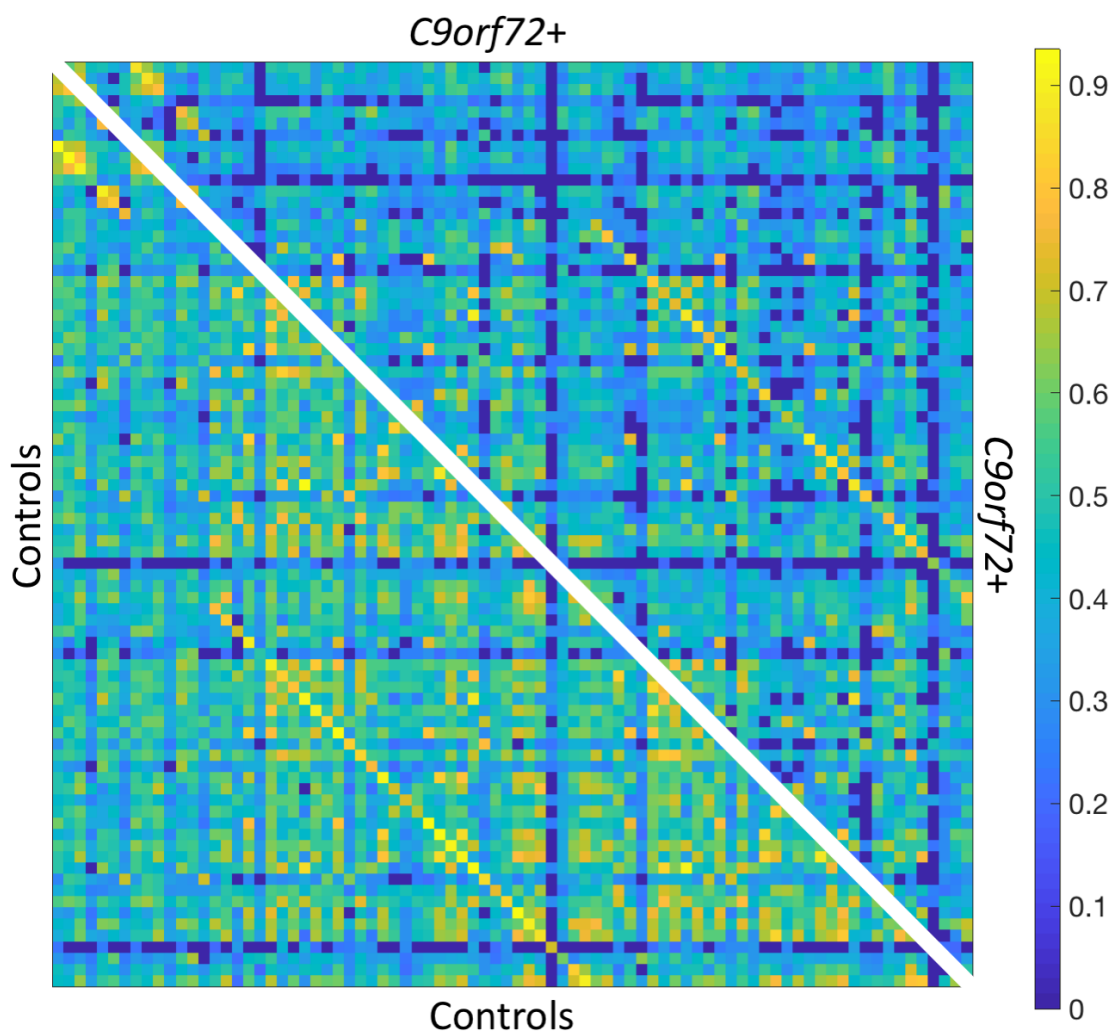

188  
189  
190  
191  
192

**Figure 1** – Resting state functional connectivity matrix thresholded at  $R \geq 0.2$ . Bottom left: HC mean connectivity matrix. Top right: C9+ mean connectivity matrix. Scale bar shows Pearson correlation coefficient.

193

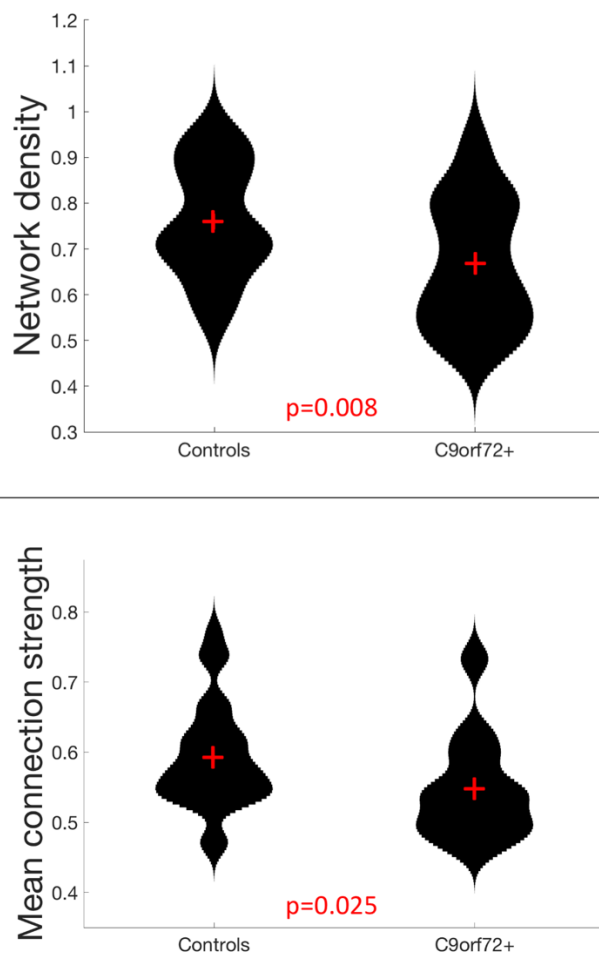

194  
195 **Figure 2** – Global network measures in which C9+ carriers significantly differed from HC.  
196

197  
198  
199 **3.1.2 Network hubs – C9+ carriers vs. Healthy Controls**  
200

201 There was minimal reorganization of hub nodes in C9+ carriers compared to the healthy control  
202 group. The composite hub score showed that 75% of the nodes comprising the top 20% of hub  
203 scores were the same for HC and C9+ carriers (**Table 4**). Moreover, with the exception of one  
204 node in the top 20% in each group, hubs were ranked within the top 30% in the other group or  
205 were the contralateral pair to one of the top 20% nodes. The single hub that was highly ranked in  
206 healthy controls but not C9+ was the left lateral orbitofrontal cortex. The single hub that ranked  
207 highly in the C9+ carrier group but not healthy controls was the left thalamus.  
208  
209  
210  
211

212 **Table 4** – Group hubs, defined as the top 20% of nodes based on a composite hub score (Z) for  
 213 Healthy Controls and C9+ carrier groups.

| HC                                           |                        | C9+                                   |                        |
|----------------------------------------------|------------------------|---------------------------------------|------------------------|
| VOI                                          | Z <sub>composite</sub> | VOI                                   | Z <sub>composite</sub> |
| <b>L Fusiform gyrus</b>                      | <b>6.740</b>           | <b>R Middle temporal gyrus</b>        | <b>8.226</b>           |
| <i>L Middle temporal gyrus</i>               | <i>5.090</i>           | <b>R Fusiform gyrus</b>               | <b>6.753</b>           |
| <i>R Inferior temporal gyrus</i>             | <i>4.952</i>           | <b>R Lingual gyrus</b>                | <b>6.692</b>           |
| <b>R Lateral orbitofrontal cortex</b>        | <b>4.701</b>           | <b>R Superior temporal gyrus</b>      | <b>6.135</b>           |
| <b>R Middle temporal gyrus</b>               | <b>4.303</b>           | <b>L Posterior cingulate cortex</b>   | <b>5.693</b>           |
| <b>R Fusiform gyrus</b>                      | <b>4.180</b>           | <b>L Putamen</b>                      | <b>5.541</b>           |
| <b>L Putamen</b>                             | <b>4.068</b>           | <b>R Superior frontal gyrus</b>       | <b>5.294</b>           |
| <u><i>L Lateral orbitofrontal cortex</i></u> | <u><i>4.007</i></u>    | <b>L Lingual gyrus</b>                | <b>4.707</b>           |
| <b>L Inferior parietal cortex</b>            | <b>3.904</b>           | <i>L Superior frontal gyrus</i>       | <i>4.628</i>           |
| <b>R Superior frontal gyrus</b>              | <b>3.722</b>           | <b>L Inferior parietal cortex</b>     | <b>4.409</b>           |
| <b>L Lingual gyrus</b>                       | <b>3.630</b>           | <b>L Superior temporal gyrus</b>      | <b>4.211</b>           |
| <i>R Posterior cingulate cortex</i>          | <i>3.608</i>           | <b>L Precentral gyrus</b>             | <b>4.111</b>           |
| <b>R Lingual gyrus</b>                       | <b>3.514</b>           | <b>L Fusiform gyrus</b>               | <b>3.235</b>           |
| <b>L Superior temporal gyrus</b>             | <b>3.489</b>           | <b>R Lateral orbitofrontal cortex</b> | <b>3.112</b>           |
| <b>R Superior temporal gyrus</b>             | <b>3.345</b>           | <i>L Inferior temporal gyrus</i>      | <i>3.110</i>           |
| <b>L Posterior cingulate cortex</b>          | <b>3.042</b>           | <u><i>L Thalamus</i></u>              | <u><i>3.046</i></u>    |

214 L = left, R = right; shared hubs shown in **bold**; hubs where the same contralateral region is a hub shown in *italics*;  
 215 hubs that were not highly ranked in the comparison group are underlined. Z<sub>composite</sub> is the composite score of each  
 216 node's Z scores in the five hub measures described above.

217

218

### 219 3.1.3 Edge analysis – C9+ vs. HC

220

221 **Figure 3** displays the edges that had significantly decreased functional connectivity in C9+  
 222 carriers compared to HC (p<0.001 uncorrected). There were no impaired intra-hemispheric  
 223 connections in the left hemisphere. All connections with decreased functional connectivity were  
 224 either inter-hemispheric or intra-hemispheric within the right hemisphere. More cortical  
 225 connections were affected than subcortical connections. The right frontal lobe had the greatest  
 226 number of reduced connections. Reduced connectivity was also seen for connections with the  
 227 basal ganglia, temporal lobe, and parietal lobes. These edges connect regions involved in a broad  
 228 range of cognitive functions. Additionally, several edges connecting motor-related regions were  
 229 affected, including the right precentral and paracentral lobules. Other regions having multiple  
 230 differing connections were the pars opercularis, pars triangularis, supramarginal gyrus, inferior  
 231 temporal gyrus, and the left putamen.

232

233



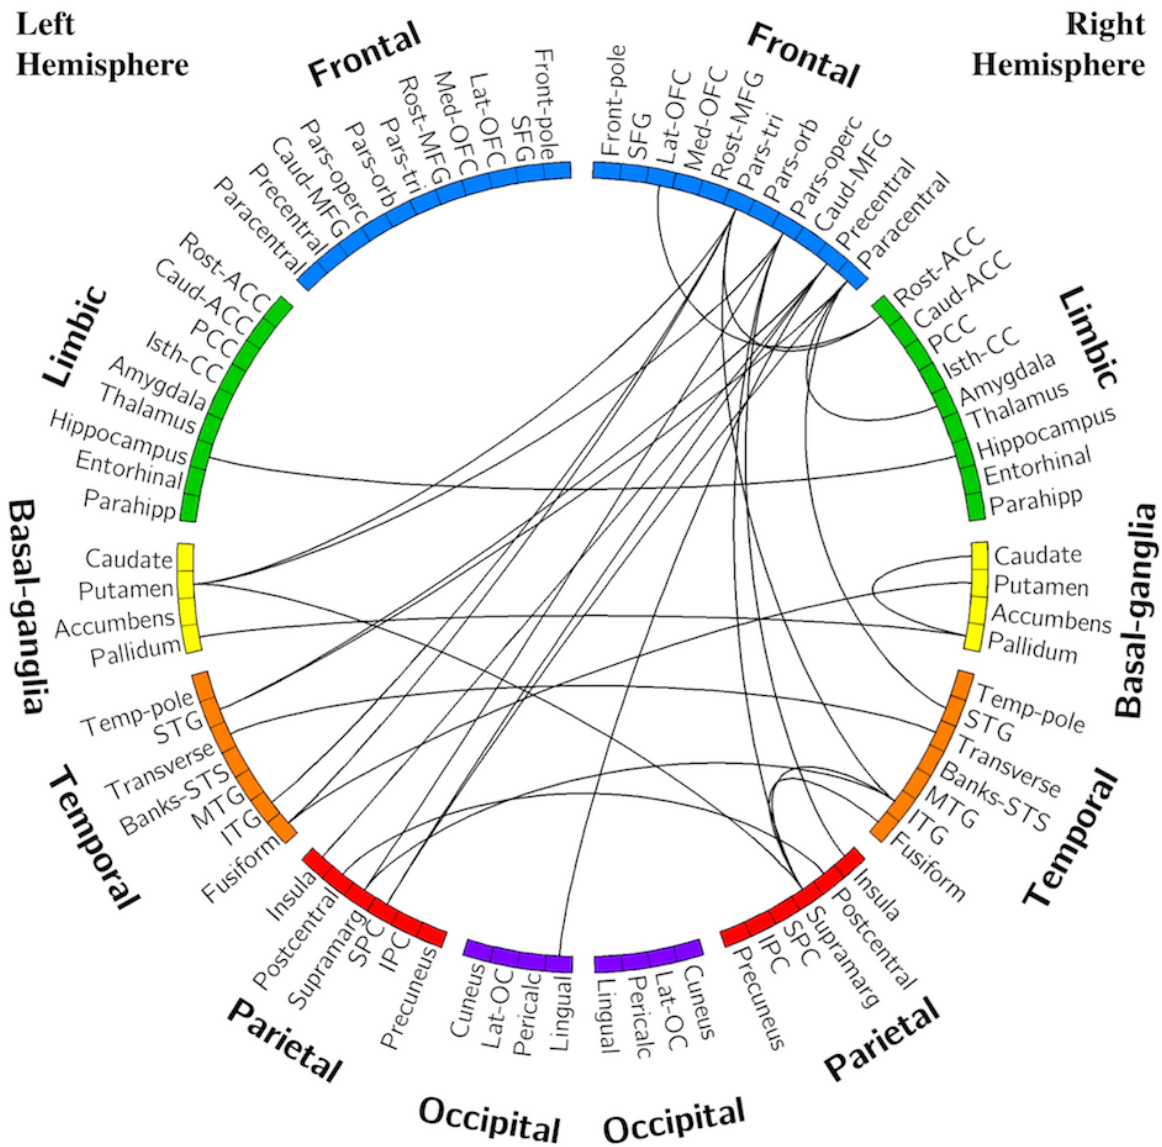

**Figure 3** – Edges with reduced connectivity strength in C9+ carriers compared with HC. Significance was determined using permutation testing at  $p < 0.001$  uncorrected. See Table 2 for region name abbreviations.

234  
235  
236  
237  
238  
239  
240  
241  
242  
243  
244  
245  
246  
247

### 3.2 Comparison of C9+ bvFTD/ALS-FTD carriers with C9+ ALS alone (bvFTD -)

#### 3.2.1 Global graph metrics – bvFTD+ vs. ALS-only

Within the symptomatic group of C9+ carriers, there were no significant differences in global metrics (network density, mean connection strength, clustering coefficient, path length, and modularity) between the 9 patients with ALS alone and the 9 patients with bvFTD or ALS-FTD.

248 **3.2.2 Network hubs – bvFTD+ vs. ALS-only**

249  
 250 The ALS-only group had similar hubs to healthy controls, with the addition of the precentral gyri  
 251 and right caudate. In contrast, the bvFTD+ group had several nodes with hub scores that were  
 252 ranked much lower than in the ALS-only group and healthy controls. These hubs included  
 253 bilateral thalamus, right hippocampus, and right lateral occipital cortex. Hubs are listed in **Table**  
 254 **5**.

255  
 256  
 257 **Table 5** – Group hubs, defined as top 20% of nodes based on composite hub score for  
 258 symptomatic patients with and without bvFTD.

| C9+ bvFTD+ (n=9)                  |                        | C9+ ALS-only (n=9)                        |                        |
|-----------------------------------|------------------------|-------------------------------------------|------------------------|
| VOI                               | Z <sub>composite</sub> | VOI                                       | Z <sub>composite</sub> |
| L Posterior cingulate cortex      | 9.512                  | <b>R Superior temporal gyrus</b>          | <b>8.346</b>           |
| <b>L Superior temporal gyrus</b>  | <b>7.121</b>           | <b>R Lingual gyrus</b>                    | <b>7.159</b>           |
| <b>R Superior frontal gyrus</b>   | <b>6.652</b>           | <b>R Middle temporal gyrus</b>            | <b>6.744</b>           |
| <b>L Superior frontal gyrus</b>   | <b>6.437</b>           | <i>L Middle temporal gyrus</i>            | <i>6.483</i>           |
| L Putamen                         | 6.391                  | <b>L Superior temporal gyrus</b>          | <b>5.412</b>           |
| <b>R Superior temporal gyrus</b>  | <b>5.528</b>           | R Caudate                                 | 5.135                  |
| R Fusiform gyrus                  | 5.102                  | <u>R Banks STS</u>                        | <u>4.803</u>           |
| <u>R Thalamus</u>                 | <u>5.022</u>           | <b>R Inferior parietal cortex</b>         | <b>4.639</b>           |
| <u>L Thalamus</u>                 | <u>4.732</u>           | <b>R Superior frontal gyrus</b>           | <b>4.535</b>           |
| <b>R Lingual gyrus</b>            | <b>4.629</b>           | <u>R Precentral gyrus</u>                 | <u>4.425</u>           |
| <u>R Lateral occipital cortex</u> | <u>4.124</u>           | L Lingual gyrus                           | 4.330                  |
| <u>L Pericalcarine cortex</u>     | <u>4.069</u>           | <u>R Caudal anterior cingulate cortex</u> | <u>3.925</u>           |
| <i>L Inferior temporal gyrus</i>  | 3.797                  | <b>L Superior frontal gyrus</b>           | <b>3.862</b>           |
| <b>R Middle temporal gyrus</b>    | <b>3.732</b>           | <u>R Isthmus of the cingulate cortex</u>  | <u>3.810</u>           |
| <b>R Inferior parietal cortex</b> | <b>3.728</b>           | <i>R Inferior temporal gyrus</i>          | 3.734                  |
| <u>R Hippocampus</u>              | <u>3.626</u>           | <u>L Precentral gyrus</u>                 | <u>3.596</u>           |

259 L = left, R = right; shared hubs shown in **bold**; hubs where the same contralateral region is a hub shown in *italics*;  
 260 hubs that were not highly ranked in the comparison group are underlined. Z<sub>composite</sub> is the composite score of each  
 261 node's Z scores in the five hub measures described above.

262  
 263  
 264  
 265 The correlations between the hub score and the FBI and ALSFRS-R scores were computed for  
 266 each of the unique hubs within each group. Three of the unique hubs in bvFTD+ patients  
 267 correlated with FBI scores across all symptomatic C9+, indicating that behavioral impairment  
 268 was associated with higher node strength (**Figure 4**). These hub nodes were the left thalamus  
 269 (R=0.443, p=0.066), right thalamus (R=0.471, p=0.049), and right hippocampus (R=0.525,  
 270 p=0.025).

271

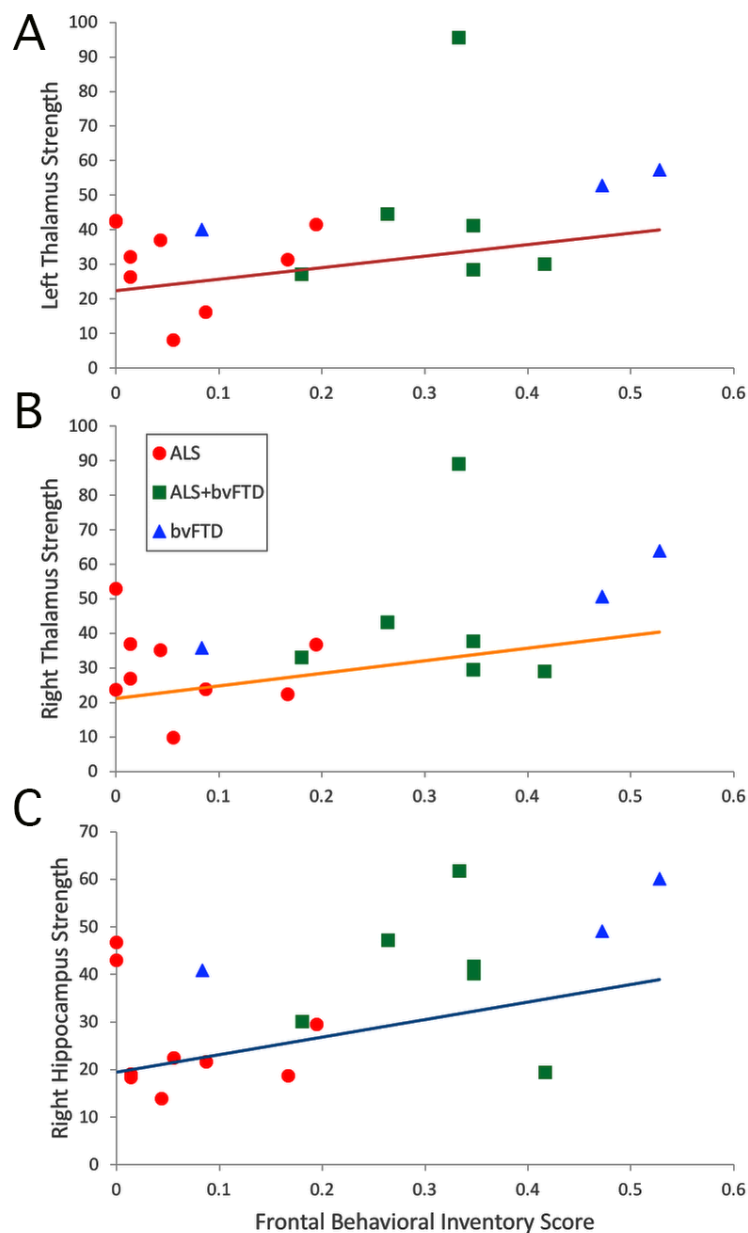

272  
273 **Figure 4** – Correlation across all symptomatic C9+ carriers of Frontal Behavioral Inventory Scores with  
274 node strength of hubs that were more highly ranked in the bvFTD+ group than ALS-only group. (A) Left  
275 thalamus,  $R=0.443$ ,  $p=0.066$  (B) Right thalamus,  $R=0.471$ ,  $p=0.049$  (C) Right hippocampus,  $R=0.525$ ,  
276  $p=0.025$ .

277

278

### 279 3.2.3 Edge analysis – C9+ bvFTD+ vs. ALS-only

280

281 Several edges had reduced connectivity strength in the ALS-only group compared to the  
282 bvFTD+ group. All statistically significant differences consisted of decreases in connection  
283 strength in the ALS-only group compared with the bvFTD+ group. The frontal and temporal  
284 regions exhibited the greatest number of decreased connections (**Figure 5**).

285

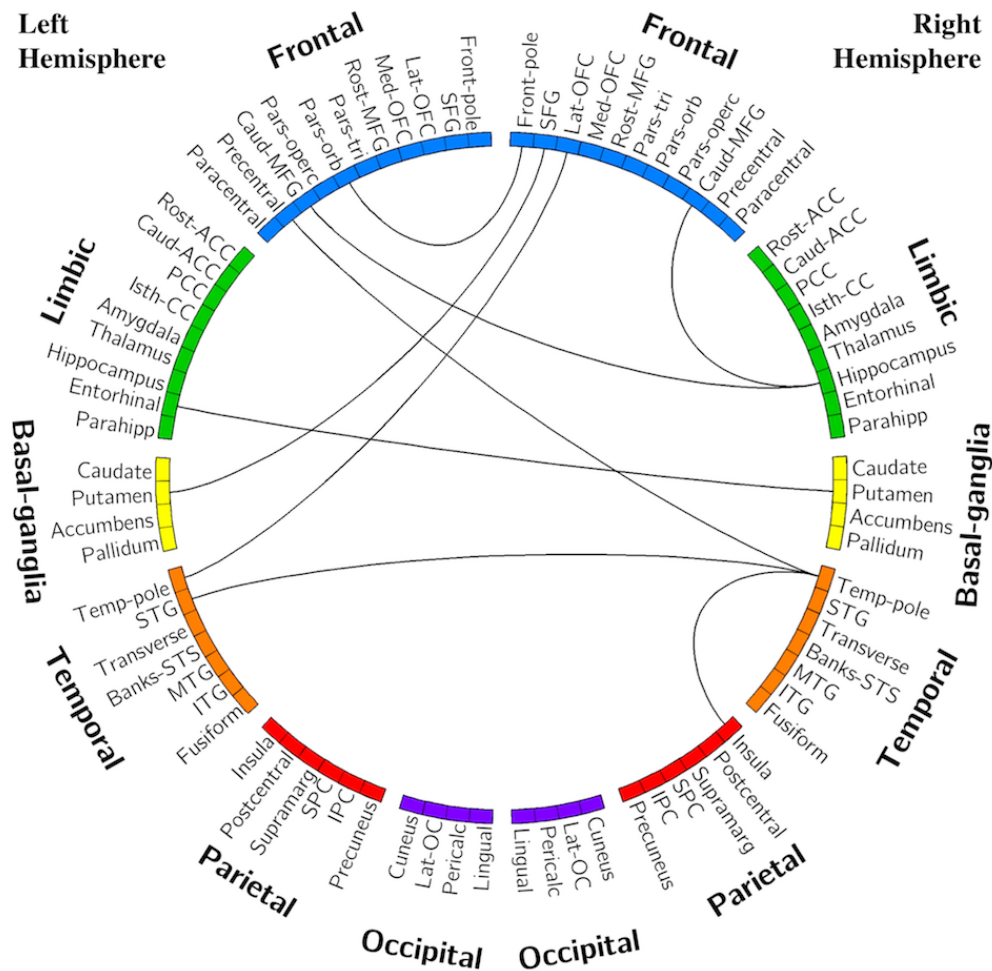

286  
 287 **Figure 5** – Edges with reduced connectivity strength in ALS-only group compared with bvFTD+/ALS-  
 288 FTD. Significance was determined using permutation testing at  $p < 0.001$  uncorrected. See Table 2 for  
 289 region name abbreviations.

290

291

#### 292 4 Discussion

293

294 In this study, we used graph theory metrics to explore alterations in network organization in  
 295 *C9orf72* mutation carriers and network correlations with motor and cognitive-behavioral  
 296 functional measures. Graph theory allows exploration of network organization and functionality  
 297 as a whole, rather than correlations between activity in discrete regions. We found that global  
 298 network measures of connectivity were reduced in a cohort of C9+ carriers with heterogenous  
 299 symptoms compared to healthy controls. Because *C9orf72* expansion mutations cause motor and  
 300 cognitive-behavioral symptoms across the ALS-FTD spectrum, we had anticipated that brain  
 301 regions known to be affected in sporadic forms of both diseases would exhibit connectivity  
 302 changes. This was mostly confirmed, with reduced connectivity specifically found in  
 303 connections involving the frontal and temporal regions and the right motor cortex, regions

304 known to be involved in cognitive and motor function. These findings are consistent with many  
305 prior studies in sporadic and C9+ FTD (13, 15, 22, 33, 46-52). However, as previously noted, the  
306 literature on resting state connectivity in sporadic ALS has many discordant results. Our findings  
307 are consistent with studies showing decreased connectivity in ALS (29, 30, 32, 51, 53). The  
308 nodes with the greatest numbers of impaired connections in the C9+ population represented  
309 regions that are involved in networks previously described as being affected in ALS and bvFTD.  
310 These regions—the right precentral, paracentral, supramarginal, and inferior temporal gyri, the  
311 pars opercularis, pars triangularis, and the left putamen—are parts of the sensorimotor, salience,  
312 and central executive networks (54, 55).

313  
314 Interestingly, while overall connectivity was decreased in the C9+ group, there appeared to be no  
315 substantial reorganization of network hubs. This indicates a relatively diffuse global decline in  
316 connectivity. Further underscoring this point, the edge analysis found no regions with increased  
317 connectivity in the C9+ network compared to HCs. This relative preservation of network  
318 organization may be interpreted as supporting the proposal that networks can compensate for low  
319 grade degeneration for a substantial period in order to maintain clinical function (56, 57). An  
320 alternative possibility is that pooling C9+ ALS, ALS-FTD, bvFTD, and presymptomatic carriers  
321 into one analysis group masked phenotype-specific network alterations.

322  
323 To explore this possibility, we compared subgroups of C9+ symptomatic patients with and  
324 without FTD. This analysis found no significant differences in global network measures  
325 between subgroups, indicating that the global decrease in connectivity observed in the full C9+  
326 cohort was likely not solely driven by a large change in one of the phenotypic subgroups.  
327 However, nodal graph theory metrics revealed some organizational differences between  
328 subgroups. Both of the symptomatic phenotypic subgroups had several hubs that were  
329 unique in comparison with the healthy controls and from the other subgroup. In the ALS-only  
330 group (i.e., patients without FTD), the bilateral precentral gyri emerged as group-specific hubs.  
331 This implies that the ALS-only subgroup either had small increases in motor cortex connectivity  
332 or that the motor cortex connectivity remained relatively stable in the face of declining  
333 connectivity of the more active nodes. This phenomenon is consistent with resting state studies  
334 of patients with sporadic ALS that demonstrate localized increases in connectivity of motor  
335 regions (15, 25, 58, 59), and could represent a compensatory mechanism or the relative resilience  
336 of the motor network.

337  
338 The bvFTD+ group had a greater number of subcortical hubs. The bilateral thalami and the right  
339 hippocampus were hub nodes in the bvFTD+ group and were not highly ranked in the ALS-only  
340 group or in healthy controls. The greater dependence on subcortical nodes could arise as a  
341 consequence of structural changes, including cortical atrophy (10, 15, 60, 61). The emergence of  
342 the thalamus as an important hub in C9+ bvFTD was somewhat surprising given that thalamic  
343 atrophy occurs in bvFTD (13, 16, 62) and in C9+ patients (8, 10, 15, 21). It also seems to conflict  
344 with resting state studies of bvFTD that report decreases in thalamic connectivity (47, 63). This  
345 may reflect differences between seed-based analysis methods (which may neglect global  
346 neuromodulatory changes) versus the whole-brain approach used here. On balance, these  
347 modulated connections could result in the thalamus having a more prominent role as a network  
348 hub. The emergence of the hippocampus as a hub may account for the preservation of memory in

349 the first few years of bvFTD symptoms (39, 62), although there are a few reports of hippocampal  
350 atrophy in bvFTD (48, 64).

351  
352 To investigate the relationship between disease severity and network hub changes, we evaluated  
353 the correlation between hub scores of hubs unique to each subgroup and the FBI and ALSFRS-R  
354 scores of symptomatic C9+ carriers. The hub scores of the bilateral thalami and right  
355 hippocampus correlated with behavioral impairment as measured by the FBI. There was also  
356 significantly higher connectivity between the right hippocampus and the right and left middle  
357 frontal gyrus in the analysis of individual connections in the bvFTD+ group. Therefore, as the  
358 thalamus and hippocampus became more hub-like, patients exhibited more severe behavioral  
359 impairment. In contrast, there was no association between the hub scores and the ALSFRS-R  
360 scores for the unique hubs in the ALS-only group. The connectivity of these motor regions  
361 appears to change independently from this measure of motor symptom severity.

362  
363 There are limitations in the present study that warrant discussion. First, because no subjects with  
364 sporadic disease were considered for this study, it is impossible to determine if any effects  
365 described here are unique to familial (and specifically C9-linked) disease. Second, as a result of  
366 our relatively small sample size, there is a large amount of heterogeneity in the study population  
367 and functional connectivity data. Subjects were grouped according to meeting diagnostic criteria  
368 for ALS and/or bvFTD; however, minor symptoms that were insufficient to meet criteria for a  
369 clinical diagnosis could nevertheless affect neural activity. Future studies with larger subgroups  
370 are warranted. Third, due to the wide variation in disease severity and duration amongst subjects,  
371 our cross-sectional design may not capture the full extent of functional connectivity changes in  
372 C9+ disease; a longitudinal study would be better suited to explore the evolution of functional  
373 connectivity changes across the ALS-FTD spectrum over time.

## 374 375 **5 Conclusion**

376  
377 Carriers of the *C9orf72* repeat expansion mutation have decreased functional connectivity at rest  
378 compared with healthy controls. Global network organization is generally preserved, although  
379 local network alterations emerge in C9+ carriers with ALS versus FTD. Subcortical regions,  
380 including the bilateral thalami and the right hippocampus, emerge as hubs associated with the  
381 severity of behavioral impairment.

## 382 383 384 385 **Conflicts of Interest**

386  
387 The authors declare that the research was conducted in the absence of any commercial or  
388 financial relationships that could be construed as a potential conflict of interest.

## 389 390 391 **Author Contributions**

392  
393 RS contributed to data collection, analytical design, data analysis and interpretation, and  
394 manuscript writing. MC contributed to data collection, data interpretation, and manuscript

395 editing. MKF contributed to project conception and design, data collection, data interpretation,  
396 and manuscript drafting.

397  
398

### 399 **Acknowledgements**

400

401 Recruitment was made possible in part by ATSDR's National ALS Registry Research

402 Notification Mechanism

403 (<https://www.cdc.gov/als/ALSResearchNotificationClinicalTrialsStudies.html>).

404 We gratefully acknowledge Jennifer Farren, R.N. for patient coordination, the neurologists who

405 referred patients, and the patients and caregivers whose participation was invaluable. We also

406 give our thanks to Laura Braun and Laura Danielian for their contributions in data collection.

407 This work utilized the computational resources of the NIH HPC Biowulf cluster

408 (<https://hpc.nih.gov>).

409

410

### 411 **Funding**

412

413 The study was supported by the intramural program of the National Institutes of Health, National

414 Institute of Neurological Disorders and Stroke. Z01 NS003146.

415

416

### 417 **References**

418

419 1. DeJesus-Hernandez M, Mackenzie IR, Boeve BF, Boxer AL, Baker M, Rutherford NJ, et al.  
420 Expanded GGGGCC hexanucleotide repeat in noncoding region of C9ORF72 causes  
421 chromosome 9p-linked FTD and ALS. *Neuron*. 2011;72(2):245-56.

422 2. Renton AE, Majounie E, Waite A, Simon-Sanchez J, Rollinson S, Gibbs JR, et al. A  
423 hexanucleotide repeat expansion in C9ORF72 is the cause of chromosome 9p21-linked ALS-  
424 FTD. *Neuron*. 2011;72(2):257-68.

425 3. Majounie E, Renton AE, Mok K, Dopper EG, Waite A, Rollinson S, et al. Frequency of the  
426 C9orf72 hexanucleotide repeat expansion in patients with amyotrophic lateral sclerosis and  
427 frontotemporal dementia: a cross-sectional study. *Lancet Neurol*. 2012;11(4):323-30.

428 4. Byrne S, Elamin M, Bede P, Shatunov A, Walsh C, Corr B, et al. Cognitive and clinical  
429 characteristics of patients with amyotrophic lateral sclerosis carrying a C9orf72 repeat expansion:  
430 a population-based cohort study. *Lancet Neurol*. 2012;11(3):232-40.

431 5. Cooper-Knock J, Kirby J, Highley R, Shaw PJ. The Spectrum of C9orf72-mediated  
432 Neurodegeneration and Amyotrophic Lateral Sclerosis. *Neurotherapeutics*. 2015;12(2):326-39.

433 6. Floeter MK, Traynor BJ, Farren J, Braun LE, Tierney M, Wiggs EA, et al. Disease progression in  
434 C9orf72 mutation carriers. *Neurology*. 2017;89(3):234-41.

435 7. Boeve BF, Boylan KB, Graff-Radford NR, DeJesus-Hernandez M, Knopman DS, Pedraza O, et  
436 al. Characterization of frontotemporal dementia and/or amyotrophic lateral sclerosis associated  
437 with the GGGGCC repeat expansion in C9ORF72. *Brain*. 2012;135(Pt 3):765-83.

- 438 8. Bede P, Bokde AL, Byrne S, Elamin M, McLaughlin RL, Kenna K, et al. Multiparametric MRI  
439 study of ALS stratified for the C9orf72 genotype. *Neurology*. 2013;81(4):361-9.
- 440 9. Cash DM, Bocchetta M, Thomas DL, Dick KM, van Swieten JC, Borroni B, et al. Patterns of  
441 gray matter atrophy in genetic frontotemporal dementia: results from the GENFI study. *Neurobiol*  
442 *Aging*. 2018;62:191-6.
- 443 10. Floeter MK, Bageac D, Danielian LE, Braun LE, Traynor BJ, Kwan JY. Longitudinal imaging in  
444 C9orf72 mutation carriers: Relationship to phenotype. *NeuroImage Clinical*. 2016;12:1035-43.
- 445 11. Whitwell JL, Weigand SD, Boeve BF, Senjem ML, Gunter JL, DeJesus-Hernandez M, et al.  
446 Neuroimaging signatures of frontotemporal dementia genetics: C9ORF72, tau, progranulin and  
447 sporadics. *Brain*. 2012;135(Pt 3):794-806.
- 448 12. Mahoney CJ, Beck J, Rohrer JD, Lashley T, Mok K, Shakespeare T, et al. Frontotemporal  
449 dementia with the C9ORF72 hexanucleotide repeat expansion: clinical, neuroanatomical and  
450 neuropathological features. *Brain*. 2012;135(Pt 3):736-50.
- 451 13. Lee SE, Khazenzon AM, Trujillo AJ, Guo CC, Yokoyama JS, Sha SJ, et al. Altered network  
452 connectivity in frontotemporal dementia with C9orf72 hexanucleotide repeat expansion. *Brain*.  
453 2014;137(Pt 11):3047-60.
- 454 14. Mahoney CJ, Simpson IJ, Nicholas JM, Fletcher PD, Downey LE, Golden HL, et al. Longitudinal  
455 diffusion tensor imaging in frontotemporal dementia. *Ann Neurol*. 2015;77(1):33-46.
- 456 15. Agosta F, Ferraro PM, Riva N, Spinelli EG, Domi T, Carrera P, et al. Structural and functional  
457 brain signatures of C9orf72 in motor neuron disease. *Neurobiol Aging*. 2017;57:206-19.
- 458 16. Lee SE, Sias AC, Mandelli ML, Brown JA, Brown AB, Khazenzon AM, et al. Network  
459 degeneration and dysfunction in presymptomatic C9ORF72 expansion carriers. *NeuroImage*  
460 *Clinical*. 2017;14:286-97.
- 461 17. Papma JM, Jiskoot LC, Panman JL, Dopfer EG, den Heijer T, Donker Kaat L, et al. Cognition  
462 and gray and white matter characteristics of presymptomatic C9orf72 repeat expansion.  
463 *Neurology*. 2017;89(12):1256-64.
- 464 18. Walhout R, Schmidt R, Westeneng HJ, Verstraete E, Seelen M, van Rheeën W, et al. Brain  
465 morphologic changes in asymptomatic C9orf72 repeat expansion carriers. *Neurology*.  
466 2015;85(20):1780-8.
- 467 19. Floeter MK, Danielian LE, Braun LE, Wu T. Longitudinal diffusion imaging across the C9orf72  
468 clinical spectrum. *J Neurol Neurosurg Psychiatry*. 2018;89(1):53-60.
- 469 20. Westeneng HJ, Walhout R, Straathof M, Schmidt R, Hendrikse J, Veldink JH, et al. Widespread  
470 structural brain involvement in ALS is not limited to the C9orf72 repeat expansion. *J Neurol*  
471 *Neurosurg Psychiatry*. 2016;87(12):1354-60.
- 472 21. Omer T, Finegan E, Hutchinson S, Doherty M, Vajda A, McLaughlin RL, et al. Neuroimaging  
473 patterns along the ALS-FTD spectrum: a multiparametric imaging study. *Amyotroph Lateral*  
474 *Scler Frontotemporal Degener*. 2017;18(7-8):611-23.
- 475 22. Caminiti SP, Canessa N, Cerami C, Dodich A, Crespi C, Iannaccone S, et al. Affective  
476 mentalizing and brain activity at rest in the behavioral variant of frontotemporal dementia.  
477 *NeuroImage: Clinical*. 2015;9:484-97.



- 478 23. Hafkemeijer A, Möller C, Dopfer EG, Jiskoot LC, van den Berg-Huysmans AA, van Swieten JC,  
479 et al. A longitudinal study on resting state functional connectivity in behavioral variant  
480 frontotemporal dementia and Alzheimer's disease. *Journal of Alzheimer's Disease*.  
481 2017;55(2):521-37.
- 482 24. Trojsi F, Caiazzo G, Corbo D, Piccirillo G, Cristillo V, Femiano C, et al. Microstructural changes  
483 across different clinical milestones of disease in amyotrophic lateral sclerosis. *PloS one*.  
484 2015;10(3):e0119045.
- 485 25. Douaud G, Filippini N, Knight S, Talbot K, Turner MR. Integration of structural and functional  
486 magnetic resonance imaging in amyotrophic lateral sclerosis. *Brain*. 2011;134(Pt 12):3470-9.
- 487 26. Heimrath J, Gorges M, Kassubek J, Müller HP, Birbaumer N, Ludolph AC, et al. Additional  
488 resources and the default mode network: Evidence of increased connectivity and decreased white  
489 matter integrity in amyotrophic lateral sclerosis. *Amyotroph Lateral Scler Frontotemporal*  
490 *Degener*. 2014:1-9.
- 491 27. Ma X, Zhang J, Zhang Y, Chen H, Li R, Wang J, et al. Altered cortical hubs in functional brain  
492 networks in amyotrophic lateral sclerosis. *Neurological Sciences*. 2015;36(11):2097-104.
- 493 28. Schulthess I, Gorges M, Müller H-P, Lulé D, Del Tredici K, Ludolph AC, et al. Functional  
494 connectivity changes resemble patterns of pTDP-43 pathology in amyotrophic lateral sclerosis.  
495 *Scientific reports*. 2016;6.
- 496 29. Mohammadi B, Kollewe K, Samii A, Krampfl K, Dengler R, Munte TF. Changes of resting state  
497 brain networks in amyotrophic lateral sclerosis. *Exp Neurol*. 2009;217(1):147-53.
- 498 30. Tedeschi G, Trojsi F, Tessitore A, Corbo D, Sagnelli A, Paccone A, et al. Interaction between  
499 aging and neurodegeneration in amyotrophic lateral sclerosis. *Neurobiol Aging*. 2012;33(5):886-  
500 98.
- 501 31. Zhang J, Ji B, Hu J, Zhou C, Li L, Li Z, et al. Aberrant interhemispheric homotopic functional  
502 and structural connectivity in amyotrophic lateral sclerosis. *J Neurol Neurosurg Psychiatry*.  
503 2016:jnnp-2016-314567.
- 504 32. Zhou C, Hu X, Hu J, Liang M, Yin X, Chen L, et al. Altered brain network in amyotrophic lateral  
505 sclerosis: a resting graph theory-based network study at voxel-wise level. *Frontiers in*  
506 *neuroscience*. 2016;10.
- 507 33. Agosta F, Sala S, Valsasina P, Meani A, Canu E, Magnani G, et al. Brain network connectivity  
508 assessed using graph theory in frontotemporal dementia. *Neurology*. 2013;81(2):134-43.
- 509 34. Loewe K, Machts J, Kaufmann J, Petri S, Heinze H-J, Borgelt C, et al. Widespread temporo-  
510 occipital lobe dysfunction in amyotrophic lateral sclerosis. *Scientific reports*. 2017;7:40252.
- 511 35. Trojsi F, Esposito F, de Stefano M, Buonanno D, Conforti FL, Corbo D, et al. Functional overlap  
512 and divergence between ALS and bvFTD. *Neurobiol Aging*. 2014.
- 513 36. Verstraete E, van den Heuvel MP, Veldink JH, Blanken N, Mandl RC, Hulshoff Pol HE, et al.  
514 Motor network degeneration in amyotrophic lateral sclerosis: a structural and functional  
515 connectivity study. *PloS one*. 2010;5(10):e13664.
- 516 37. Rubinov M, Sporns O. Complex network measures of brain connectivity: uses and  
517 interpretations. *NeuroImage*. 2010;52(3):1059-69.

- 518 38. Ludolph A, Drory VE, Hardiman O, Nakano I, Ravits J, Robberecht W, et al. A revision of the El  
519 Escorial Criteria - 2015. *Amyotroph Lateral Scler and Frontotemporal Dementia*. 2015;16(5-  
520 6):291-82.
- 521 39. Rascovsky K, Hodges JR, Knopman D, Mendez MF, Kramer JH, Neuhaus J, et al. Sensitivity of  
522 revised diagnostic criteria for the behavioural variant of frontotemporal dementia. *Brain*.  
523 2011;134(Pt 9):2456-77.
- 524 40. Cedarbaum JM, Stambler N, Malta E, Fuller C, Hilt D, Thurmond B, et al. The ALSFRS-R: a  
525 revised ALS functional rating scale that incorporates assessments of respiratory function. BDNF  
526 ALS Study Group (Phase III). *J Neurol Sci*. 1999;169(1-2):13-21.
- 527 41. Kertesz A, Davidson W, Fox H. Frontal Behavioral Inventory: Diagnostic Criteria for Frontal  
528 Lobe Dementi. *Canadian Journal of Neurological Sciences*. 1997;24(1):29-36.
- 529 42. Desikan RS, Segonne F, Fischl B, Quinn BT, Dickerson BC, Blacker D, et al. An automated  
530 labeling system for subdividing the human cerebral cortex on MRI scans into gyral based regions  
531 of interest. *NeuroImage*. 2006;31(3):968-80.
- 532 43. Power JD, Barnes KA, Snyder AZ, Schlaggar BL, Petersen SE. Spurious but systematic  
533 correlations in functional connectivity MRI networks arise from subject motion. *NeuroImage*.  
534 2012;59(3):2142-54.
- 535 44. Nichols TE, Holmes AP. Nonparametric permutation tests for functional neuroimaging: a primer  
536 with examples. *Hum Brain Mapp*. 2002;15(1):1-25.
- 537 45. Fornito A, Zalesky A, Bullmore E. *Fundamentals of Brain Network Analysis*: Academic Press;  
538 2016.
- 539 46. Filippi M, Agosta F, Scola E, Canu E, Magnani G, Marcone A, et al. Functional network  
540 connectivity in the behavioral variant of frontotemporal dementia. *Cortex*. 2013;49(9):2389-401.
- 541 47. Hafkemeijer A, Möller C, Dopfer EG, Jiskoot LC, Schouten TM, van Swieten JC, et al. Resting  
542 state functional connectivity differences between behavioral variant frontotemporal dementia and  
543 Alzheimer's disease. *Frontiers in human neuroscience*. 2015;9.
- 544 48. Jastorff J, De Winter FL, Van den Stock J, Vandenberghe R, Giese MA, Vandenburghe M.  
545 Functional dissociation between anterior temporal lobe and inferior frontal gyrus in the  
546 processing of dynamic body expressions: Insights from behavioral variant frontotemporal  
547 dementia. *Human brain mapping*. 2016;37(12):4472-86.
- 548 49. Meijboom R, Steketee R, de Koning I, Osse RJ, Jiskoot L, De Jong FJ, et al. Functional  
549 connectivity and microstructural white matter changes in phenocopy frontotemporal dementia.  
550 *European radiology*. 2017;27(4):1352-60.
- 551 50. Meijboom R, Steketee RM, Ham LS, van der Lugt A, van Swieten JC, Smits M. Differential  
552 Hemispheric Predilection of Microstructural White Matter and Functional Connectivity  
553 Abnormalities between Respectively Semantic and Behavioral Variant Frontotemporal Dementia.  
554 *Journal of Alzheimer's Disease*. 2017;56(2):789-804.
- 555 51. Trojsi F, Esposito F, de Stefano M, Buonanno D, Conforti FL, Corbo D, et al. Functional overlap  
556 and divergence between ALS and bvFTD. *Neurobiol Aging*. 2015;36(1):413-23.
- 557 52. Tuovinen T, Rytty R, Moilanen V, Elseoud AA, Veijola J, Remes AM, et al. The effect of gray  
558 matter ICA and coefficient of variation mapping of BOLD data on the detection of functional

- 559 connectivity changes in Alzheimer's disease and bvFTD. *Frontiers in human neuroscience*.  
560 2016;10.
- 561 53. Zhou F, Gong H, Li F, Zhuang Y, Zang Y, Xu R, et al. Altered motor network functional  
562 connectivity in amyotrophic lateral sclerosis: a resting-state functional magnetic resonance  
563 imaging study. *Neuroreport*. 2013;24(12):657-62.
- 564 54. Damoiseaux JS, Rombouts SA, Barkhof F, Scheltens P, Stam CJ, Smith SM, et al. Consistent  
565 resting-state networks across healthy subjects. *Proc Natl Acad Sci U S A*. 2006;103(37):13848-  
566 53.
- 567 55. Seeley WW, Menon V, Schatzberg AF, Keller J, Glover GH, Kenna H, et al. Dissociable intrinsic  
568 connectivity networks for salience processing and executive control. *J Neurosci*.  
569 2007;27(9):2349-56.
- 570 56. Feis RA, Bouts M, de Vos F, Schouten TM, Panman JL, Jiskoot LC, et al. A multimodal MRI-  
571 based classification signature emerges just prior to symptom onset in frontotemporal dementia  
572 mutation carriers. *J Neurol Neurosurg Psychiatry*. 2019.
- 573 57. Rittman T, Borchert R, Jones S, van Swieten J, Borroni B, Galimberti D, et al. Functional  
574 network resilience to pathology in presymptomatic genetic frontotemporal dementia. *Neurobiol*  
575 *Aging*. 2019;77:169-77.
- 576 58. Agosta F, Valsasina P, Absinta M, Riva N, Sala S, Prella A, et al. Sensorimotor functional  
577 connectivity changes in amyotrophic lateral sclerosis. *Cereb Cortex*. 2011;21(10):2291-8.
- 578 59. Schulthess I, Gorges M, Muller HP, Lule D, Del Tredici K, Ludolph AC, et al. Functional  
579 connectivity changes resemble patterns of pTDP-43 pathology in amyotrophic lateral sclerosis.  
580 *Sci Rep*. 2016;6:38391.
- 581 60. Mahoney CJ, Downey LE, Ridgway GR, Beck J, Clegg S, Blair M, et al. Longitudinal  
582 neuroimaging and neuropsychological profiles of frontotemporal dementia with C9ORF72  
583 expansions. *Alzheimers Res Ther*. 2012;4(5):41.
- 584 61. Yokoyama JS, Rosen HJ. Neuroimaging features of C9ORF72 expansion. *Alzheimers Res Ther*.  
585 2012;4(6):45.
- 586 62. Seeley WW, Crawford R, Rascofsky K, Kramer JH, Weiner M, Miller BL, et al. Frontal  
587 paralimbic network atrophy in very mild behavioral variant frontotemporal dementia. *Archives of*  
588 *neurology*. 2008;65(2):249-55.
- 589 63. Farb NA, Grady CL, Strother S, Tang-Wai DF, Masellis M, Black S, et al. Abnormal network  
590 connectivity in frontotemporal dementia: evidence for prefrontal isolation. *Cortex*.  
591 2013;49(7):1856-73.
- 592 64. Rytty R, Nikkinen J, Paavola L, Elseoud AA, Moilanen V, Visuri A, et al. GroupICA dual  
593 regression analysis of resting state networks in a behavioral variant of frontotemporal dementia.  
594 *Frontiers in human neuroscience*. 2013;7.
- 595
